# Supplementary material
Source: HighWire-hosted journal article supplement (https://fg.bmj.com/content/flgastro-2024-102918)
Supplement: inline-supplementary-material-1 [file inline-supplementary-material-1.pdf]

**Table 1.** Study characteristics of the articles included in the systematic review.

| Author (Year)                             | Study Design | Participants/<br>patients | Baseline<br>Characteristics<br><br>(Median/mean age,<br>gender)               | Intervention | Comparator            | Outcome                                                                                                                                                                                                                                                                                                                                                                                                                                                                       |
|-------------------------------------------|--------------|---------------------------|-------------------------------------------------------------------------------|--------------|-----------------------|-------------------------------------------------------------------------------------------------------------------------------------------------------------------------------------------------------------------------------------------------------------------------------------------------------------------------------------------------------------------------------------------------------------------------------------------------------------------------------|
| Chen et al.<br><br>(2022) <sup>[10]</sup> | RCT          | 235                       | Age = 69.7+/-11.8<br><br>Female =112<br><br>(47.7%) Male =<br><br>123 (52.3%) | EUS-FNB      | EUS-FNA +<br><br>ROSE | <b>EUS-FNB:</b> accuracy =92.2%; specificity = 100%;<br><br>sensitivity = 92.5%; procedure time= 19.3(8.0);<br><br>Mean number of needle passes = 2.3(0.6); Cost-<br>minimization = +\$45 more in USA and +\$102<br>more in Canada<br><br><b>EUS-FNA + ROSE:</b> accuracy = 93.3%;<br><br>sensitivity = 96.5%; specificity 100%; mean<br>procedure time = 22.7(10.8); Mean number of<br>needle passes = 3.0(1.1); Cost-minimization =<br><br>\$719 in USA and \$540 in Canada |

|                                         |               |     |                                                                                                                                                    |         |                |                                                                                                                                                                                                                                       |
|-----------------------------------------|---------------|-----|----------------------------------------------------------------------------------------------------------------------------------------------------|---------|----------------|---------------------------------------------------------------------------------------------------------------------------------------------------------------------------------------------------------------------------------------|
| Sbeit and Khoury (2021) <sup>[19]</sup> | Retrospective | 74  | Age = EUS-FNB: 66.7±11.4. EUS-FNA + ROSE = 72.2±14.5<br>Gender: EUS-FNB = Male 11 (52.4%). EUS-FNA + ROSE = Male 37 (69.8%) and female 16 (30.2%). | EUS-FNB | EUS-FNA + ROSE | Cost-analysis: EUS-FNB = \$1226 ± 369.EUS-FNA +ROSE = \$1158 ± 309.6                                                                                                                                                                  |
| Chong et al. (2020) <sup>[14]</sup>     | RCT           | 244 | Age = 60.2(15.0)<br>Male n=137 (56.1%) Female n= 107 (43.9%)                                                                                       | MOSE    | EUS-FNTA       | <b>MOSE:</b> yield = 92.6%; accuracy = 95.1%; sensitivity = 98.9%; specificity = 83.9%; number of passes = 2(1-3); procedure time n=22.2(10.7)<br><b>Conventional EUS-FNTA:</b> yield n= 89.3%; accuracy = 91.0%; sensitivity= 98.9%; |

|                                             |               |     |                                                                      |                |         |                                                                                                                                                                                                                                                                                |
|---------------------------------------------|---------------|-----|----------------------------------------------------------------------|----------------|---------|--------------------------------------------------------------------------------------------------------------------------------------------------------------------------------------------------------------------------------------------------------------------------------|
|                                             |               |     |                                                                      |                |         | specificity=68.8%; number of passes = 3                                                                                                                                                                                                                                        |
| Leung Ki et al.<br>(2019) <sup>[20]</sup>   | Retrospective | 46  | Age = 70<br><br>Male =34 (74%)<br><br>Female= 12(26%)                | MOSE           | n/a     | <b>MOSE:</b> accuracy= 94%; sensitivity=92%;<br><br>specificity= 100%; Number of passes = 1(1-2)                                                                                                                                                                               |
| Mangiavillano et al. (2021) <sup>[21]</sup> | Retrospective | 387 | Age = 67+12<br><br>Male=233 (62%)<br><br>Female = 145<br><br>(n=38%) | MOSE           | n/a     | <b>MOSE:</b> accuracy = 87.3%; sensitivity = 85.2%;<br><br>specificity=100%                                                                                                                                                                                                    |
| Nebel et al.<br>(2021) <sup>[15]</sup>      | RCT           | 65  | Age: 59 (19-82);<br><br>Gender: Female = 37, Male = 28               | EUS-FNA + ROSE | EUS-FNA | <b>EUS-FNA + ROSE:</b> accuracy = 93%; procedure duration = 30±11.3; needle passes = 2.6±0.8; yield 81.8%<br><br><b>EUS-FNA:</b> accuracy = 88%; procedure duration = 37±7.2; needle passes = 3.5±0.8; yield = 84.3%<br><br>Diagnostic yield was similar (non-significant) for |

|                                               |               |     |                                                        |                       |         |                                                                                                                                                                                                                                                                                                                                                                                                                              |
|-----------------------------------------------|---------------|-----|--------------------------------------------------------|-----------------------|---------|------------------------------------------------------------------------------------------------------------------------------------------------------------------------------------------------------------------------------------------------------------------------------------------------------------------------------------------------------------------------------------------------------------------------------|
|                                               |               |     |                                                        |                       |         | ROSE and non-ROSE groups, considering overall patients and enrollment.                                                                                                                                                                                                                                                                                                                                                       |
| Milluzzo et al.<br><br>(2023) <sup>[22]</sup> | Retrospective | 91  | n/a                                                    | EUS-FNA +<br><br>ROSE | EUS-FNA | <b>EUS-FNA:</b> adequacy= 96.2%; yield = 76.9%;<br><br>accuracy = 69.2%; sensitivity = 63.7%;<br><br>specificity = 100%<br><br><b>EUS-FNA+ ROSE (first year):</b> adequacy =<br><br>96.6%; yield = 89.7%; accuracy = 86.2%;<br><br>sensitivity = 91.7%; specificity = 100%;<br><br><b>EUS-FNA+ ROSE (second year):</b> adequacy =<br><br>100%; yield = 92.1%; accuracy = 89.5%;<br><br>sensitivity = 91.2%; specificity=100% |
| So et al. (2021)<br><br><sup>[6]</sup>        | Retrospective | 75  | Age = 62<br><br>Male= 39 (52%)<br><br>Female= 36 (48%) | MOSE                  | n/a     | MOSE: accuracy= 97.3%, sensitivity=96.7%<br><br>specificity=97.8%<br>Number of passes = 2 (2-5)                                                                                                                                                                                                                                                                                                                              |
| Sundaram et al.<br><br>(2023) <sup>[23]</sup> | Retrospective | 155 | Age= 55.1 +12.9<br><br>Male = 93 (60%)                 | MOSE                  | ROSE    | <b>ROSE:</b> sensitivity = 96.9%; specificity = 100%<br><br><b>MOSE:</b> sensitivity = 96.1 %; specificity = 100%                                                                                                                                                                                                                                                                                                            |

|                                            |             |     |                                                                                |                        |         |                                                                                                                                                                                                                                                                                    |
|--------------------------------------------|-------------|-----|--------------------------------------------------------------------------------|------------------------|---------|------------------------------------------------------------------------------------------------------------------------------------------------------------------------------------------------------------------------------------------------------------------------------------|
|                                            |             |     | Female = 62 (40%)                                                              |                        |         |                                                                                                                                                                                                                                                                                    |
| Iwashita et al.<br>(2015) <sup>[9]</sup>   | Prospective | 100 | Age=69<br><br>Male = 59 (59%)<br><br>Female = 41 (41%)                         | MOSE                   | n/a     | MOSE: sensitivity= 94.1%; specificity = 100%;<br><br>accuracy = 95.5%; Number of passes= 2                                                                                                                                                                                         |
| Eloubeidi et al.<br>(2006) <sup>[25]</sup> | Prospective | 540 | Age = 63.0<br><br>Male = 412<br><br>(62.8%)<br><br>Female = 244<br><br>(37.2%) | ROSE of<br><br>EUS-FNA | n/a     | ROSE: accuracy = 93.9%; sensitivity = 92.8%;<br><br>specificity = 95.8%                                                                                                                                                                                                            |
| Zhang et al.<br>(2022) <sup>[16]</sup>     | RCT         | 194 | Age: 62.19±11.47<br><br>Male = 119<br><br>(61.3%)                              | EUS-FNA +<br><br>ROSE  | EUS-FNA | EUS-FNA + ROSE: Accuracy = 94.8%;<br><br>sensitivity = 94.4%; specificity = 100%;<br><br>adequacy = 100%; needle passes = 3.38 ± 1.00<br><br>EUS-FNA alone: accuracy = 70.1%; sensitivity =<br><br>65.1%; specificity = 100%; adequacy = 80.4%;<br><br>needle passes = 3.22 ± 0.89 |

|                                            |               |     |                                                             |                       |                                           |                                                                                                                                                                                                           |
|--------------------------------------------|---------------|-----|-------------------------------------------------------------|-----------------------|-------------------------------------------|-----------------------------------------------------------------------------------------------------------------------------------------------------------------------------------------------------------|
| Crinò et al.<br>(2021) <sup>[17]</sup>     | RCT           | 771 | Men = 56.4%;<br><br>Women = 43.6%<br><br>Age: 67.5±11.5     | EUS-FNB +<br><br>ROSE | EUS-FNB alone                             | EUS-FNB + ROSE: accuracy = 96.4%;<br><br>specificity = 100%; sensitivity = 96%<br><br>EUS-FNB alone: accuracy = 97.4%; specificity = 100%; sensitivity = 97.3%                                            |
| Sonthalia et al.<br>(2024) <sup>[18]</sup> | RCT           | 96  | n/a                                                         | EUS-FNB +<br><br>MOSE | EUS-FNA alone                             | EUS-FNB + MOSE: accuracy = 95.8%; yield = 97.9%; needle passes = 2<br><br>EUS-FNA alone: accuracy = 91.6%; yield = 95.8%; needle passes = 3<br><br>Procedure duration was similar for the two mechanisms. |
| Wong et al.<br>(2024) <sup>[26]</sup>      | Prospective   | 65  | Age: 66<br><br>Gender: Women = 32 (48.5%); Men = 33 (51.5%) | MOSE                  | Cytologist interpretation &<br><br>IRCETE | MOSE: accuracy = 57%; needle passes = 1; procedure time = 4.0±1.7<br><br>IRCETE: accuracy = 59%; needle passes = 1; procedure time = 14.3±4.7<br><br>Cytologist: accuracy = 64%; needle passes = 1        |
| Guan et al.                                | Retrospective | 141 | Age: EUS-FNA =                                              | EUS-FNA +             | EUS-FNA alone                             | EUS-FNA + MOSE: sensitivity = 89.8%;                                                                                                                                                                      |

|                        |  |  |                                                                                                                               |      |  |                                                                                                                   |
|------------------------|--|--|-------------------------------------------------------------------------------------------------------------------------------|------|--|-------------------------------------------------------------------------------------------------------------------|
| (2024) <sup>[24]</sup> |  |  | 65 (60-72); EUS-FNA + MOSE = 66 (58-71)<br><br>Gender: EUS-FNA: Male = 34, Female = 2; EUS-FNA + MOSE: Male = 41, Female = 23 | MOSE |  | specificity = 100%; accuracy = 90.6%<br><br>EUS-FNA alone: sensitivity = 75%; specificity = 66.7%; accuracy = 75% |
|------------------------|--|--|-------------------------------------------------------------------------------------------------------------------------------|------|--|-------------------------------------------------------------------------------------------------------------------|

Note: RCT – randomized controlled trial; EUS-FNB - Endoscopic ultrasound-guided fine needle biopsy; EUS-FNA – Endoscopic ultrasound-guided fine-needle aspiration; ROSE – Rapid on-site evaluation; MOSE - Macroscopic on-site evaluation; EUS-FNTA – Endoscopic ultrasound-guided fine-needle tissue acquisition; IRCETE – in-room cytologic evaluation by trained endo sonographer

Table 2. Quality assessment via NOS scale

| Study ID                    | Exposed cohort representativeness | Non-exposed cohort selection | Exposure verification | Initial outcome absence | Cohort comparability (Design/Analysis adjusted for confounders) | Outcome evaluation | Sufficient follow-up | Cohort follow-up | Total score | Overall quality |
|-----------------------------|-----------------------------------|------------------------------|-----------------------|-------------------------|-----------------------------------------------------------------|--------------------|----------------------|------------------|-------------|-----------------|
| Sbeit and Khoury (2021)     | 1                                 | 0                            | 1                     | 1                       | 0                                                               | 1                  | 1                    | 1                | 6           | Fair            |
| Leung Ki et al. (2019)      | 1                                 | 0                            | 1                     | 1                       | 0                                                               | 1                  | 1                    | 1                | 5           | Fair            |
| Mangiavillano et al. (2021) | 1                                 | 0                            | 1                     | 1                       | 0                                                               | 1                  | 1                    | 1                | 5           | Fair            |
| Milluzzo et al. (2023)      | 1                                 | 0                            | 1                     | 1                       | 0                                                               | 1                  | 0                    | 1                | 4           | Fair            |
| So et al. (2021)            | 1                                 | 0                            | 1                     | 1                       | 0                                                               | 1                  | 1                    | 1                | 5           | Fair            |
| Sundaram et al. (2023)      | 1                                 | 0                            | 1                     | 1                       | 0                                                               | 1                  | 0                    | 1                | 5           | fair            |
| Iwashita et al. (2015)      | 1                                 | 0                            | 1                     | 1                       | 0                                                               | 1                  | 0                    | 1                | 5           | Fair            |
| Eloubeidi et al. (2006)     | 1                                 | 0                            | 1                     | 1                       | 0                                                               | 1                  | 1                    | 1                | 5           | Fair            |
| Wong et al. (2024)          | 1                                 | 0                            | 1                     | 1                       | 0                                                               | 1                  | 1                    | 1                | 6           | Fair            |
| Guan et al. (2024)          | 1                                 | 0                            | 1                     | 1                       | 0                                                               | 1                  | 0                    | 1                | 4           | Fair            |
